# Supplementary material for: A synergic effect of sodium on the phase transition of tungsten-doped vanadium dioxide
Source: Royal Society of Chemistry journal article supplement (doi:10.1039/c4cp00366g), 2014-01-01
Supplement: c4cp00366g1.pdf [file c4cp00366g1.pdf]

Supporting Information for A Synergy Effect of Sodium on the Phase Transition of  
Tungsten-doped Vanadium Dioxide

**Qiang Song<sup>a</sup>, Weitao Gong<sup>a</sup>, Guiling Ning<sup>a\*</sup>, Hassan Mehdi<sup>a</sup>, Guiqi Zhang<sup>a</sup>, Yuan Lin<sup>a</sup>  
and Junwei Ye<sup>a</sup>**

EXPERIMENTAL METHODS

*Materials Synthesis.*

V<sub>2</sub>O<sub>5</sub> (3.00 g) and dopants were mixed by grinding and put into a ceramic crucible. The mixture was heated to 800 °C in a retort furnace for about 30 min. Then the mixed molten liquid was quickly poured into deionized water to form doped V<sub>2</sub>O<sub>5</sub> sol by stirring in high speed. The sol was dried at 80 °C over night. Then an amorphous dried gel was obtained. The dried gel was collected annealing at 500 °C for 2h. Reduction of the doped V<sub>2</sub>O<sub>5</sub> precursor to doped VO<sub>2</sub> was carried out according to our previously reported procedure. Doped V<sub>2</sub>O<sub>5</sub> particles were heated under mixed gas flow of ammonia (NH<sub>3</sub>, 15 ml/min) and nitrogen (N<sub>2</sub>, 150 ml/min) at 500 °C for 1 h, and further annealed in N<sub>2</sub> at 700 °C for 5h. At last, blue black powder products were synthesized. The condition of high temperature annealing is in N<sub>2</sub> at 1100 °C for 2h. Doped VO<sub>2</sub> samples were prepared with different extents of dopants requiring: 0.5 at% Na<sub>2</sub>WO<sub>4</sub> doping sample with 0.049g of Na<sub>2</sub>WO<sub>4</sub> powders, 1.0 at% Na<sub>2</sub>WO<sub>4</sub> doping sample with 0.097g of Na<sub>2</sub>WO<sub>4</sub>, 1.5 at% Na<sub>2</sub>WO<sub>4</sub> doping sample with 0.156g of Na<sub>2</sub>WO<sub>4</sub>, 2.0 at% Na<sub>2</sub>WO<sub>4</sub> doping sample with 0.194g of Na<sub>2</sub>WO<sub>4</sub> powders, 1.0 at% WO<sub>3</sub> doping sample with 0.077g of WO<sub>3</sub> and 2.0 at% NaOH doping sample with 0.026g of NaOH.

*Materials Characterization*

Crystalline phase identification was characterized by powder X-ray diffraction (XRD) on a Rigaku D/max 2400 X-ray equipped with graphite monochromatized Cu K $\alpha$  radiation ( $\lambda = 1.5406 \text{ \AA}$ ) with samples mounted using a grooved glass sample holder. A scan rate of  $0.02^\circ \text{ s}^{-1}$  was applied to record the pattern in the  $2\theta$  range from

5° to 80°. The phase transitions in the as-prepared VO<sub>2</sub> powders was studied via Differential scanning calorimetry (DSC, Netzsch, Germany) under a flowing gaseous ultra pure nitrogen atmosphere over a temperature range from -20 to 100 °C at a heating rate of 10 K/min. Valences of the elements were studied by X-ray photoelectron spectroscopy (XPS, VG ESCALAB MK II). The morphologies and surface chemical elements of the final products were examined by scanning electron microscopy SEM, JSM- 5610LV and Hitachi SU-70 operated at 20 kV equipped with an energy dispersive X-ray analysis detector. The Raman spectra were taken with a double monochromator with a spectral resolution of <math>2\text{cm}^{-1}</math> and were excited by 0.3~1  $\mu\text{W}$  of the 532nm line laser. Raman spectra were acquired using a Thermo Fisher Scientific DRX microscope.

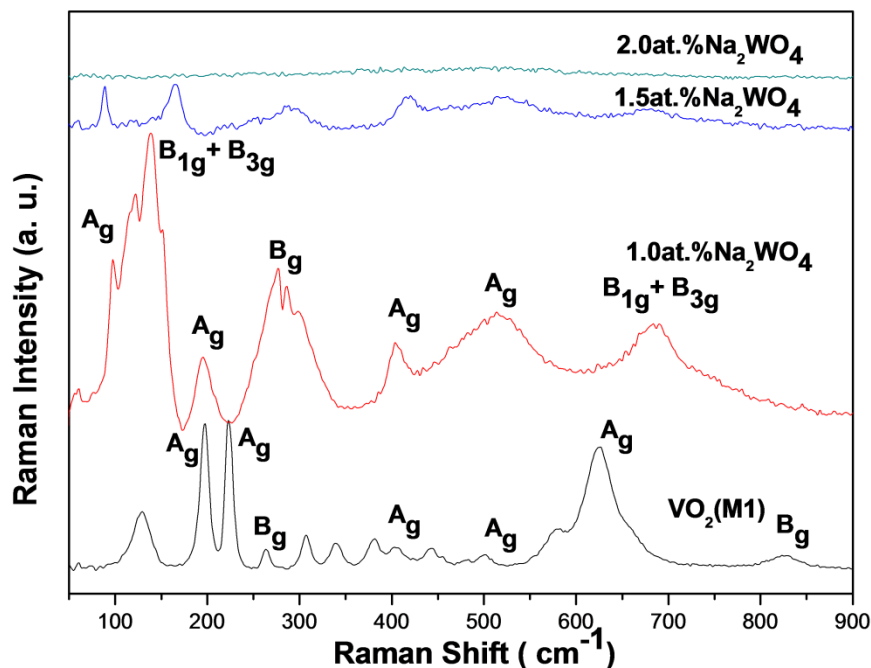

Figure S1. Room-temperature Raman spectra acquired for  $\text{VO}_2$  samples with increasing using. The mode assignments noted in Figure S1 are based on previously reported polarized Raman studies and group theory predictions. The M1 phase is discernible up to 1.0 at. %  $\text{Na}_2\text{WO}_4$  using and the rutile phase surmised from the absence of Raman bands in the sample with 2.0 at.%  $\text{Na}_2\text{WO}_4$  using, it may be due to surface oxidation of the particles in the atmospheric and further oxidation because of local heating of the laser. <sup>[1-3]</sup>

[1] Luisa Whittaker, Tai-Lung Wu, Adam Stabile, Sambandamurthy, and Sarbajit Banerjee, Single-Nanowire Raman Microprobe Studies of Doping-, Temperature-, and Voltage-Induced Metal\_Insulator Transitions of  $\text{W}_x\text{V}_{1-x}\text{O}_2$  Nanowires, *ACS Nano*, 2011, 5, 8861–8867

[2] Peter Schilbe, Raman scattering in  $\text{VO}_2$ , *Physica B* 2002, 316–317, 600–602

[3] Bo Zhou and Deyan He Raman spectrum of vanadium pentoxide from density-functional perturbation theory *J. Raman Spectrosc.* 2008, 39, 1475–1481

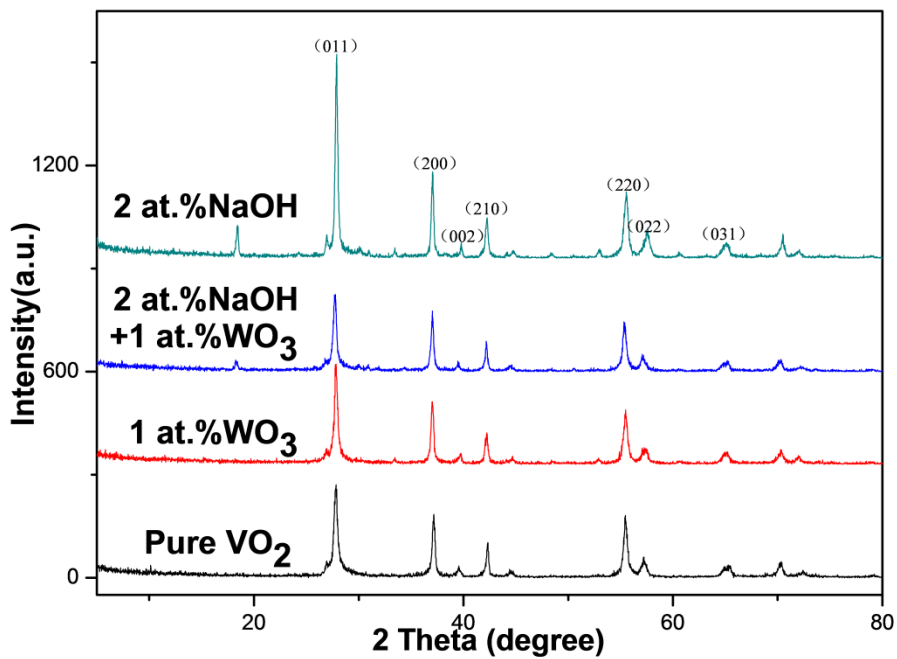

**Figure S2.** X-ray diffraction pattern for pure VO<sub>2</sub> and doped VO<sub>2</sub> samples with different dopants. The indexed diffraction patterns are expected for monoclinic VO<sub>2</sub> (M1) from JCPDS Card no. 043-1051.

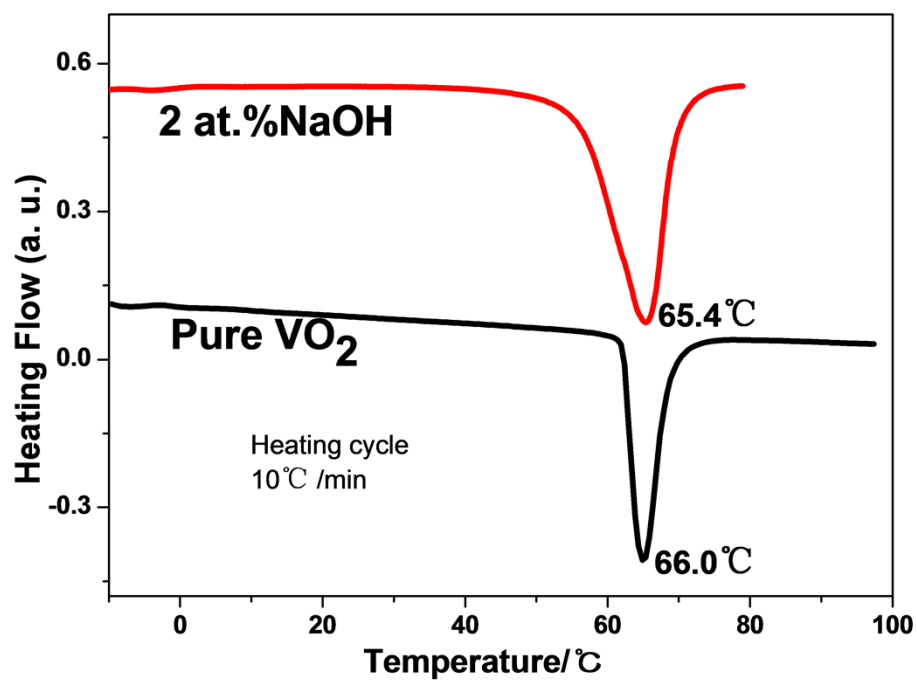

**Figure S3.** DSC for pure VO<sub>2</sub> and doped VO<sub>2</sub> samples with different dopants. The vertical lines indicate the peak positions expected for monoclinic VO<sub>2</sub> (M1) from JCPDS Card no. 043-1051.

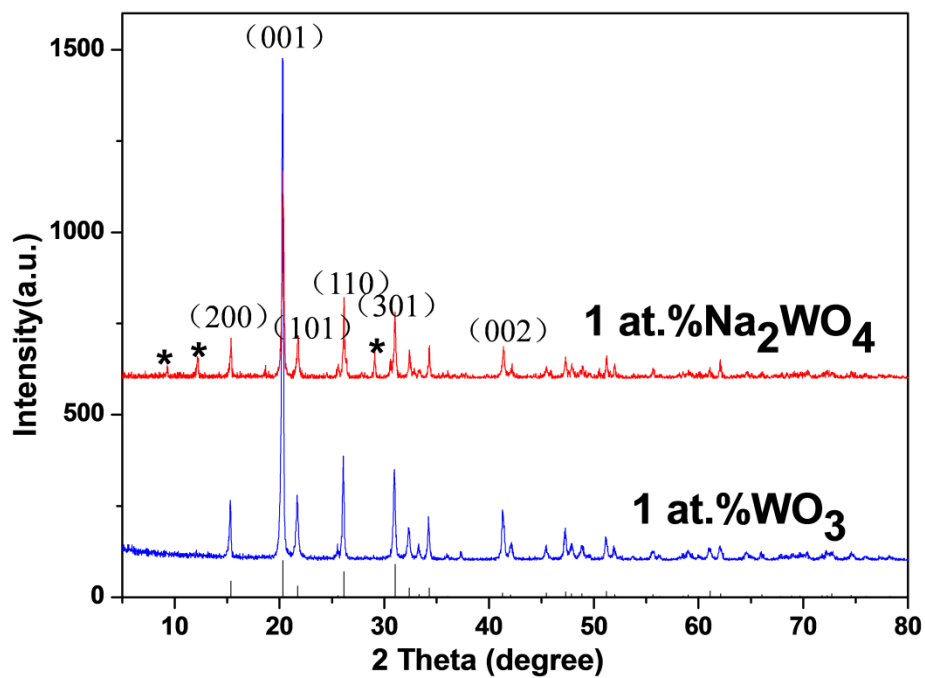

**Figure S4** XRD pattern for V<sub>2</sub>O<sub>5</sub> precursors adding with 1at.% content Na<sub>2</sub>WO<sub>4</sub> and WO<sub>3</sub>. The vertical lines indicate the peak positions expected for orthorhombic V<sub>2</sub>O<sub>5</sub> from JCPDS Card no. 065-0131, while the additional peaks (indicated by asterisks) correspond to Monoclinic Card no. Na<sub>0.33</sub>V<sub>2</sub>O<sub>5</sub> JCPDS-48-0382

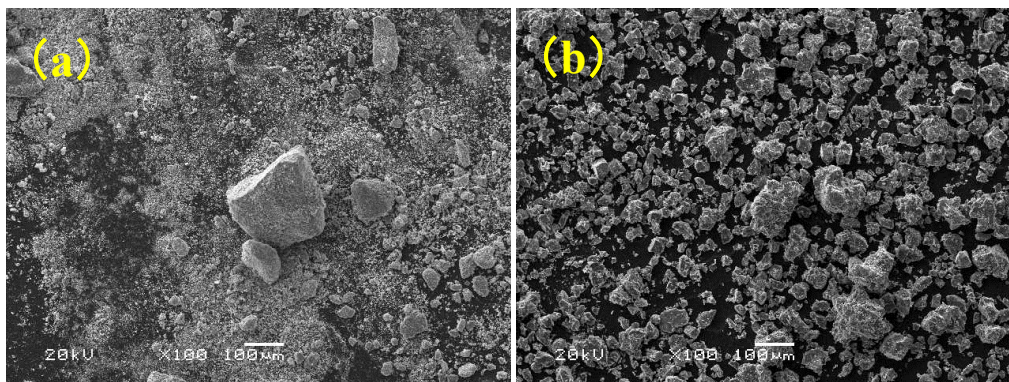

**Figure S5** Low magnification SEM images of 1.0at.%  $\text{Na}_2\text{WO}_4$  doped  $\text{VO}_2$  samples (a) have been annealed in  $\text{N}_2$  at  $700\text{ }^\circ\text{C}$  for 5h and (b) further annealed in  $\text{N}_2$  at  $1100\text{ }^\circ\text{C}$  for 2h.

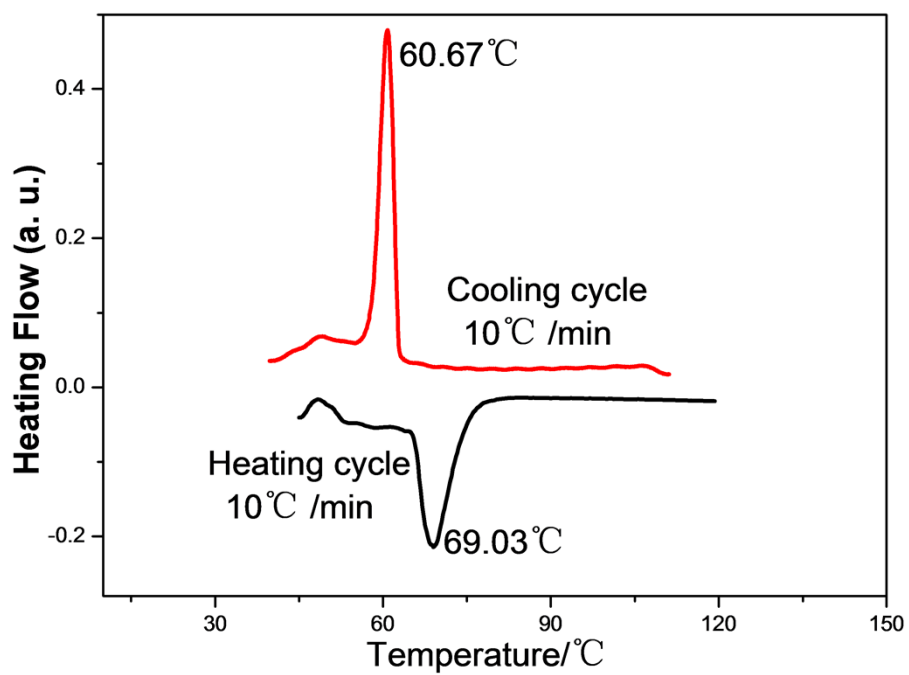

**Figure S6** DSC curve of Pure VO<sub>2</sub> have been annealed in N<sub>2</sub> at 700 °C for 5h and further annealed in N<sub>2</sub> at 1100 °C for 2h.



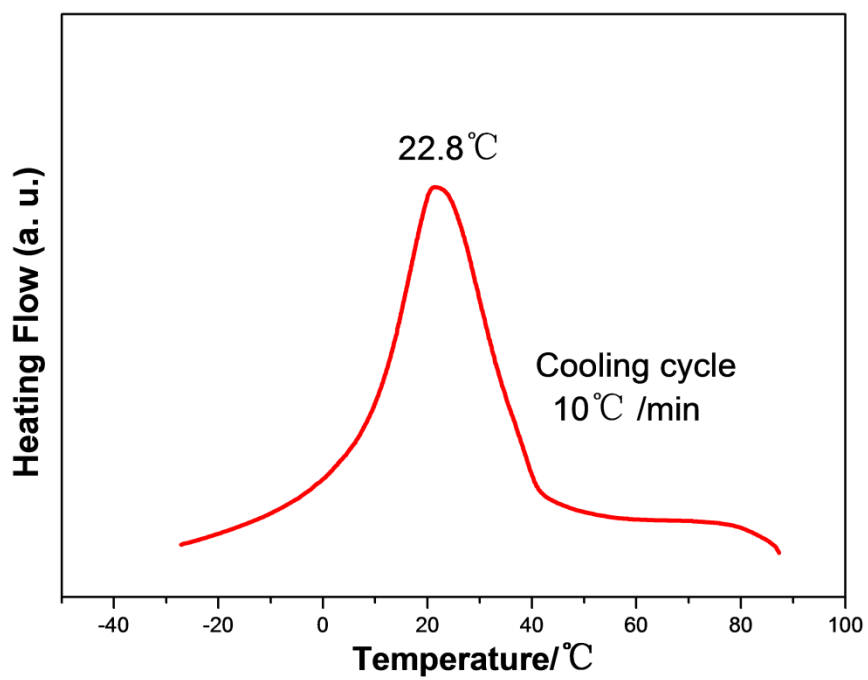

**Figure S7** DSC curve of doped VO<sub>2</sub> sample with 1.0 at. % Na<sub>2</sub>WO<sub>4</sub> have been annealed in N<sub>2</sub> at 700 °C for 5h.
